# Neural basis of irony comprehension in children with autism: the role of prosody and context

A. Ting Wang,<sup>1,4</sup> Susan S. Lee,<sup>3</sup> Marian Sigman<sup>1,2</sup> and Mirella Dapretto<sup>2,3</sup>

Departments of <sup>1</sup>Psychology, <sup>2</sup>Psychiatry and Biobehavioral Sciences, <sup>3</sup>Ahmanson-Lovelace Brain Mapping Center, University of California, Los Angeles, CA and <sup>4</sup>Department of Psychiatry, Mount Sinai School of Medicine, New York, NY, USA

Correspondence to: Mirella Dapretto, PhD, UCLA Department of Psychiatry and Biobehavioral Sciences, Ahmanson-Lovelace Brain Mapping Center, Room 101, 660 Charles E. Young Drive South, Los Angeles, CA 90095-7085, USA

E-mail: mirella@loni.ucla.edu

**While individuals with autism spectrum disorders (ASD) are typically impaired in interpreting the communicative intent of others, little is known about the neural bases of higher-level pragmatic impairments. Here, we used functional MRI (fMRI) to examine the neural circuitry underlying deficits in understanding irony in high-functioning children with ASD. Participants listened to short scenarios and decided whether the speaker was sincere or ironic. Three types of scenarios were used in which we varied the information available to guide this decision. Scenarios included (i) both knowledge of the event outcome and strong prosodic cues (sincere or sarcastic intonation), (ii) prosodic cues only or (iii) knowledge of the event outcome only. Although children with ASD performed well above chance, they were less accurate than typically developing (TD) children at interpreting the communicative intent behind a potentially ironic remark, particularly with regard to taking advantage of available contextual information. In contrast to prior research showing hypoactivation of regions involved in understanding the mental states of others, children with ASD showed significantly greater activity than TD children in the right inferior frontal gyrus (IFG) as well as in bilateral temporal regions. Increased activity in the ASD group fell within the network recruited in the TD group and may reflect more effortful processing needed to interpret the intended meaning of an utterance. These results confirm that children with ASD have difficulty interpreting the communicative intent of others and suggest that these individuals can recruit regions activated as part of the normative neural circuitry when task demands require explicit attention to socially relevant cues.**

**Keywords:** autism; brain development; fMRI; language pragmatics; social cognition

**Abbreviations:** ASD = autism spectrum disorders; BA = Brodmann area; EKO = event knowledge only; IFG = inferior frontal gyrus; MPFC = medial prefrontal cortex; PCO = prosodic cues only; STG = superior temporal gyrus; STS = superior temporal sulcus; TD = typically developing

Received September 20, 2005. Revised January 9, 2006. Accepted January 14, 2006. Advance Access publication February 15, 2006.

## Introduction

A disparity between formal linguistic skills (e.g. syntax, phonology, morphology) on one hand and pragmatic impairments (i.e. difficulties with the social use of language in context) on the other is evident in high-functioning individuals with autism spectrum disorders (ASD) (Minshew *et al.*, 1997; Tager-Flusberg, 1981). For example, individuals with ASD frequently misinterpret the intended meaning of non-literal language—such as irony—as consistent with the literal meaning (Happé, 1995). Irony, the use of words to express something other than and especially the opposite of the literal meaning, is used commonly and understood effortlessly in

everyday conversations. Detecting irony, however, actually involves rather complex mental representations, as the listener needs to understand not only that the speaker does not mean exactly what she/he said, but also that she/he does not expect to be taken literally. Accordingly, prior research has demonstrated an association between ‘theory of mind’ tasks tapping into the ability to represent the mental states of others and the ability to understand irony in both typically developing (TD) children (Sullivan *et al.*, 1995) and children with ASD (Happé, 1993). High-functioning individuals with ASD who successfully perform second-order theory of mind

tasks (i.e. representing beliefs about another's beliefs) may correctly detect irony in a laboratory setting (Happé, 1993), but they still have difficulty justifying their responses and show little evidence of using and understanding irony in their everyday lives (Leekam and Prior, 1994).

An understanding of the intended meaning behind an ironic remark typically emerges between 7 and 8 years of age (Ackerman, 1981; Demorest *et al.*, 1984; Winner and Leekam, 1991; Hancock *et al.*, 2000). Several researchers have shown that the presence of strong intonational cues—usually lower pitch, longer tempo and greater intensity (Rockwell, 2000)—facilitates the interpretation of ironic utterances in TD children (Ackerman, 1986; Capelli *et al.*, 1990; de Groot *et al.*, 1995; Milosky and Ford, 1997; Keenan and Quigley, 1999). In addition, TD children rely heavily on contextual cues in order to detect a speaker's ironic intent when an event outcome is incongruent with the literal meaning of a remark (Ackerman, 1986).

Difficulty in appreciating irony is widely reported in individuals with ASD (Tantam, 1991; Happé, 1993, 1994; Leekam and Prior, 1994; Kaland *et al.*, 2002, 2005; Martin and McDonald, 2004). This impairment could be related to deficits in using both prosodic and contextual information to make inferences about a speaker's communicative intent. Although very little is known about the ability of individuals with ASD to perceive and interpret prosodic cues in the speech of others (Paul *et al.*, 2005), evidence suggests that impairments in extracting meaning from voices are present from a very early age. Unlike TD children and children with learning disabilities, children with autism do not show a preference for listening to their mother's voice (Klin, 1991, 1992) and may actually prefer a non-speech analogue to motherese (Kuhl *et al.*, 2005). Furthermore, older children and adults with ASD are impaired in identifying emotion expressed through tone of voice (Hobson *et al.*, 1989; Van Lancker *et al.*, 1989; Rutherford *et al.*, 2002). With regard to the ability to use contextual information in a meaningful way, several studies have shown that children and adults with ASD are less likely than controls to use sentence context to aid in the correct pronunciation of homographs (e.g. 'there was a tear in her eye' versus 'there was a tear in her dress') and tend to give the more frequent pronunciation of a word instead of the appropriate one (Frith and Snowling, 1983; Happé, 1997; Jolliffe and Baron-Cohen, 1999; Lopez and Leekam, 2003). In addition, high-functioning adults with ASD are less able than controls to use context to make a global inference about a story character's action (Jolliffe and Baron-Cohen, 2000) and to appreciate the intent behind indirect requests (Ozonoff and Miller, 1996).

Neuropsychological research suggests that right hemisphere and prefrontal regions play important roles in irony comprehension. More specifically, patients with unilateral lesions in the right hemisphere are impaired in interpreting irony relative to both healthy controls (Tompkins and Mateer, 1985; Kaplan *et al.*, 1990; Winner *et al.*, 1998) and patients with left hemisphere brain damage, after controlling

for the effects of aphasia (Giora *et al.*, 2000). In addition, patients with prefrontal damage are less able to detect irony relative to patients with posterior lesions (Shamay *et al.*, 2002). In particular, ventromedial prefrontal damage is associated with difficulty in comprehending irony (Shamay-Tsoory *et al.*, 2003, 2005), although the extent of damage to lateral prefrontal regions (inferior and middle frontal gyri) of the left hemisphere has also been found to correlate with poor performance (Giora *et al.*, 2000; Zaidel *et al.*, 2002). Numerous neuroimaging studies have implicated the medial prefrontal cortex (MPFC), superior temporal sulcus (STS) and temporal poles as comprising a network involved in reasoning about the mental states of others (Siegal and Varley, 2002; Frith and Frith, 2003). Thus far, only one neuroimaging study has focused on the neural circuitry supporting irony comprehension in particular (Wang *et al.*, submitted for publication). Consistent with the broader literature on theory of mind, both TD children and adults showed selective activity in the MPFC and bilateral temporal regions during potentially ironic scenarios that contained convergent facial, prosodic and contextual cues.

In recent years, significant progress has been made in describing both structural (Bauman and Kemper, 2005; Courchesne and Pierce, 2005) and functional (see Pelphrey *et al.*, 2004 for a review) abnormalities associated with ASD. Many researchers have focused on lower-level perceptual impairments, such as those associated with face and voice processing (Siegal and Blades, 2003; Schultz, 2005). Relatively little is known about the neural circuitry underlying higher-level pragmatic impairments that persist even in high-functioning individuals with ASD. There is some evidence to suggest abnormalities in the networks previously described as supporting theory of mind abilities. Three studies have examined the neural basis of mentalizing impairments in adults with ASD, and all have observed abnormalities in MPFC activity in comparison with normal controls (Happé *et al.*, 1996; Castelli *et al.*, 2002; Nieminen-von Wendt *et al.*, 2003). In the only study to date focusing on the neural underpinnings of impairments in irony comprehension, we recently asked children with ASD to view cartoon drawings while listening to short scenarios, where one of the characters makes a remark that is potentially ironic (Wang *et al.*, submitted for publication). Consistent with the findings from the mentalizing studies described above, reduced activity in the MPFC and the right superior temporal gyrus (STG) was observed in ASD relative to TD children during the perception of potentially ironic versus control scenarios. However, MPFC activity increased reliably when children with ASD were given explicit instructions to attend to the speaker's facial expression and tone of voice, suggesting that neural functioning in the MPFC is, under some circumstances, intact in individuals with ASD.

In everyday social interactions, multiple converging cues (i.e. facial expression, tone of voice and knowledge of event outcome) are not always present. Consider, for example, a speaker who opens a conversation with the comment, 'I've

had such a great morning!’ Without further contextual information about the events of that morning, the listener must rely on other cues, such as the speaker’s facial expression and/or tone of voice to determine if the remark is sincere or ironic. Conversely, a speaker can deliver an ironic comment with a deadpan expression, where the facial cues and intonation are both neutral, forcing the listener to use contextual cues to interpret the intent of a remark. The goal of the present study was to examine the neural circuitry underlying impairments in understanding irony in children with ASD, paying particular attention to the roles of prosody and context in inferring a speaker’s communicative intent in the absence of facial affect cues. Given that impairments in utilizing both prosodic (Hobson *et al.*, 1989; Van Lancker *et al.*, 1989; Rutherford *et al.*, 2002) and contextual (Ozonoff and Miller, 1996; Happe, 1997; Jolliffe and Baron-Cohen, 2000) cues are associated with ASD, we expected children with ASD to be less accurate than TD children at correctly detecting irony, given either intonational information or contextual information, or both. Because of the close link between theory of mind abilities and irony comprehension, we predicted that children with ASD would show less activity in brain regions known to be involved in mentalizing (i.e. MPFC, STS, temporal poles) relative to TD children.

## Methods

### Participants

Two groups of children and adolescents participated in the study: 18 males with autism or Asperger syndrome (7.4–16.9 years of age) and 18 TD males (8.1–15.7 years of age) were recruited through referrals from the UCLA Autism Evaluation Clinic and through flyers posted around the UCLA campus and the greater Los Angeles area. All participants were right-handed, native English speakers, with a verbal IQ > 70. Exclusionary criteria included a reported history of known neurological (e.g. epilepsy) or major psychiatric (e.g. schizophrenia) disorders other than autism and the presence of a structural brain abnormality (e.g. aneurysm). For the comparison group, the Social Communication Questionnaire (Rutter *et al.*, 2003) was used to screen for the presence of autistic symptomatology. For the ASD group, prior clinical diagnoses of ASD were confirmed using both the Autism Diagnostic Interview—Revised (ADI-R) (Lord *et al.*, 1994) and the Autism Diagnostic Observation Schedule—Generic (ADOS-G) (Lord *et al.*, 2000). The social responsiveness scale (Constantino *et al.*, 2003) was used to assess the severity of social impairment. The groups did not differ significantly in chronological age or IQ scores, as assessed using either the Wechsler Intelligence Scale for Children—Third Edition (Wechsler, 1991) or the Wechsler Abbreviated Scale of Intelligence (Wechsler, 1999). Participant characteristics, including chronological age, verbal, performance and full-scale IQ are presented in Table 1. Written informed consent was obtained from participants and their parents according to the specifications of the UCLA Institutional Review Board.

### Stimuli

In each of three experimental conditions, participants listened to short scenarios and determined whether the speaker was being

**Table 1** Participants’ characteristics

| Characteristics           | TD (mean $\pm$ SD) | ASD (mean $\pm$ SD) |
|---------------------------|--------------------|---------------------|
| Chronological age (years) | 11.9 $\pm$ 2.3     | 11.9 $\pm$ 2.8      |
| Verbal IQ                 | 108 $\pm$ 13       | 99 $\pm$ 18         |
| Performance IQ            | 103 $\pm$ 15       | 105 $\pm$ 16        |
| Full-scale IQ             | 106 $\pm$ 14       | 102 $\pm$ 18        |
| SRS                       | NA                 | 102 $\pm$ 29        |

**Table 2** Example scenarios

| Condition | Scenario                                                                            | Prosody        |
|-----------|-------------------------------------------------------------------------------------|----------------|
| EK + PC   | Jack just got his test back. Ron sees the <i>F/A</i> * on it and says, ‘Way to go!’ | Ironic/sincere |
|           | Steve went to the barbershop.                                                       | Ironic/sincere |
|           | When Jen sees his <i>bad/nice</i> haircut, she says, ‘You look great!’              |                |
| EKO       | Jack just got his test back. Ron sees the <i>F/A</i> on it and says, ‘Way to go!’   | Neutral        |
|           | Steve went to the barbershop.                                                       | Neutral        |
|           | When Jen sees his <i>bad/nice</i> haircut, she says, ‘You look great!’              |                |
| PCO       | Jack just got his test back. Ron sees the <i>grade</i> on it and says, ‘Way to go!’ | Ironic/sincere |
|           | Steve went to the barbershop.                                                       | Ironic/sincere |
|           | When Jen sees his <i>new</i> haircut, she says, ‘You look great!’                   |                |

\*F and A denote a failing and excellent grade, respectively, in USA schools.

sincere or ironic. All scenarios ended with a remark that was literally positive, but could have a sarcastic intent. In the event knowledge + prosodic cues condition (EK + PC), both information about the valence of the event and strong prosodic cues (sincere or ironic tone of voice) were available to aid in interpreting the speaker’s communicative intent. In the ‘event knowledge only’ condition (EKO), contextual cues about the event outcome were provided, but the speaker’s remark was made with a neutral intonation. In the ‘prosodic cues only’ condition (PCO), no information about the event outcome was given, but the speaker’s remark was made in a strongly ironic or sincere (positive) tone of voice. Examples of stimuli are presented in Table 2. The three versions of each scenario were matched in terms of syntactic structure, semantic complexity and length. Following the final remark, participants had to decide whether the speaker really meant what he/she said. Yes/no judgments were indicated by pressing a button with the index or middle finger, respectively. Instructions were clear that a ‘yes’ response should be given if the comment was sincere and should be taken literally, while a ‘no’ response should indicate that the final remark was sarcastic and the speaker meant the opposite of what he/she said. Participants were shown examples of scenarios not used during the scan and all demonstrated an understanding of the task requirements.

To verify that the final comments sounded sincere, ironic or neutral as intended, 12 adult volunteers listened to the remarks presented in isolation (i.e. without the surrounding context) and rated them on a scale of 1–7, with 1 as the anchor for ironic, 4 as the mid-point for neutral and 7 as the end-point for sincere/complimentary. Ironic remarks received a mean rating of

**Table 3** Behavioural performance

| Condition | Accuracy (% correct) |             |          |                 | Response time (s) |             |          |                 |
|-----------|----------------------|-------------|----------|-----------------|-------------------|-------------|----------|-----------------|
|           | TD                   | ASD         | <i>t</i> | df <sup>a</sup> | TD                | ASD         | <i>t</i> | df <sup>a</sup> |
| EK + PC   | 99.1 (3.9)           | 90.8 (11.2) | 2.95**   | 21              | 2.58 (0.23)       | 2.69 (0.71) | 0.641    | 21              |
| EKO       | 93.5 (10.1)          | 81.8 (17.7) | 2.45*    | 27              | 2.59 (0.34)       | 2.65 (0.75) | 0.273    | 24              |
| PCO       | 86.1 (13.1)          | 82.2 (21.8) | 0.651    | 34              | 2.61 (0.64)       | 2.68 (0.62) | 0.766    | 34              |

<sup>a</sup>Degrees of freedom reflect unequal variances between groups; \*\* $P < 0.01$ ; \* $P < 0.05$ .

$1.3 \pm 0.6$ , neutral comments were rated as  $4.0 \pm 0.7$  and sincere comments were rated as  $6.7 \pm 0.5$ .

### Activation paradigm

Scenarios were presented in three 90-s activation blocks (one per condition), which were interspersed with rest periods of 21 s. Each condition consisted of six scenarios, presented at a rate of 15 s per story, where the speaker's communicative intent was ironic in half of the scenarios and sincere in the other half. Each participant heard only one version of every scenario. In order to avoid any specific item effects, each scenario was used equally often in each condition. The order of conditions was counterbalanced across subjects in a Latin square design. Response times and accuracy were recorded during scanning.

### Data acquisition

Images were acquired on a Siemens Allegra 3T Scanner. A T2-weighted sagittal scout was used to prescribe the planes of the functional images and to ensure that no structural abnormalities were present. For each subject, the functional data consisted of 155 whole-brain volumes collected in the axial plane parallel to the anterior–posterior commissural line using an echoplanar imaging (EPI) gradient-echo sequence [repetition time (TR) = 3000 ms, echo time (TE) = 25 ms, 3 mm slice thickness/1 mm gap,  $64 \times 64$  matrix size and field of view (FOV) = 20 cm]. A coplanar, high-resolution EPI structural volume (TR = 5000 ms, TE = 33 ms,  $128 \times 128$  matrix size and FOV = 20 cm) was also acquired.

### Data analysis

We analysed the imaging data using SPM99 (<http://www.fil.ion.ucl.ac.uk/spm/>). Functional images were first realigned to correct for head motion with automated image registration (AIR) (Woods *et al.*, 1998a) using a linear rigid-body registration algorithm. In order to allow for inter-subject averaging, all images were then transformed into a Talairach-compatible standard space (Woods *et al.*, 1999) using polynomial non-linear warping (Woods *et al.*, 1998b). Functional volumes were smoothed using a 6 mm full-width-half-maximum Gaussian kernel to increase signal-to-noise ratio.

For each subject, condition effects were estimated according to the general linear model using a box-car reference function with a 6-s delay to compensate for the lag in haemodynamic response. Response time and accuracy scores

collected during scanning were entered as regressors to ensure that, for each subject, any differences observed in activation patterns between conditions were not due to differences in task difficulty. The resulting contrast images were entered into group analyses using a random-effects model to allow for inferences at the population level (Friston *et al.*, 1999). In order to identify significant activity for each activation condition independent of performance, analyses of covariance (ANCOVA) were conducted for each group, treating accuracy as a nuisance variable. Between-group differences were also examined using ANCOVAs, with accuracy as a covariate, in order to control for between-group differences in performance. Results were initially explored using liberal thresholds of  $P < 0.05$ , uncorrected for multiple comparisons, for both magnitude and spatial extent. However, we consider reliable and discuss only those activations that survived more stringent thresholds of  $P < 0.01$  ( $t > 2.58$ ) at the voxel level and  $P < 0.05$ , corrected for multiple comparisons, at the cluster level. Within- and between-group comparisons were made within regions where reliable activation was detected in either group across all conditions. Because the verbal IQ of children with ASD was slightly, though not significantly, lower than that of TD children, we ran supplementary ANCOVAs to control for verbal IQ, in addition to performance accuracy. These analyses, not reported here for the sake of brevity, confirmed that our findings did not reflect between-group differences in verbal IQ.

Lastly, analyses were also conducted to address the effects of head movement during scanning. For each subject, mean head motion was computed using AIR by averaging the displacements across all voxels in all functional images relative to their mean position (Woods, 2003). No between-group differences were observed in terms of the mean motion detected throughout the functional scan.

## Results

### Behavioural results

Both TD and ASD children performed above chance levels in all conditions (Table 3). However, a repeated-measures ANOVA yielded a main effect of group, such that TD children were significantly more accurate overall than children with ASD [ $F(1,34) = 7.83$ ,  $P < 0.01$ ]. Although no group  $\times$  condition interactions were observed, planned comparisons revealed that TD children performed more accurately than

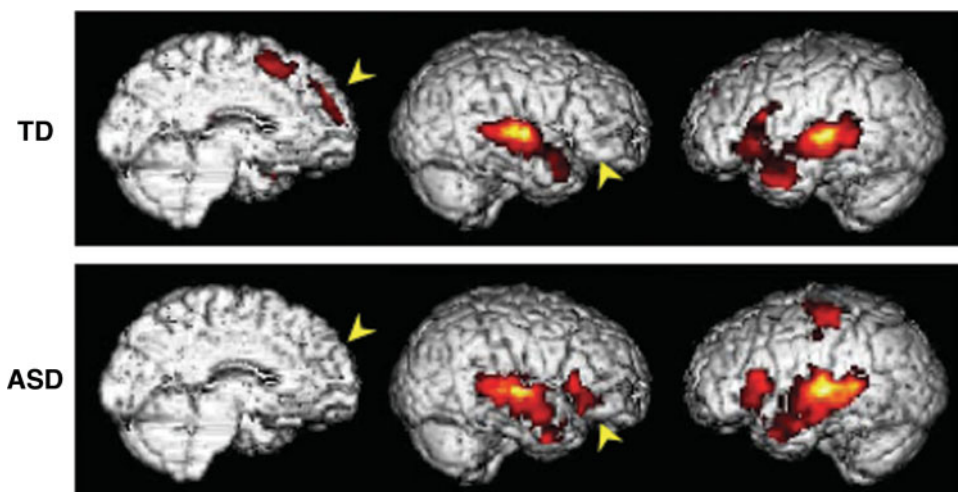

**Fig. 1** Brain activity during potentially ironic scenarios relative to rest. Reliable activity was observed in the MPFC in the TD group but not in the ASD group across all conditions. Although both groups engaged the IFG in the left hemisphere, only children with ASD showed reliable prefrontal activity in the right hemisphere. In addition, the ASD group showed reliable activity in the left pre- and post-central gyrus, which probably reflects increased sensory and motor responsiveness to the response pad in the right hand. Figures are thresholded at  $t > 2.58$ , corrected for multiple comparisons at the cluster level,  $P < 0.05$ .

children with ASD in the two conditions in which contextual knowledge of the event outcome was provided (the EK + PC condition and the EKO condition). Somewhat unexpectedly, the groups did not differ significantly when only prosodic cues were available (PCO condition). No between-group differences were observed in response time, either overall or in any of the conditions.

## Functional MRI (fMRI) results

### All conditions

Across all conditions, both groups showed reliable activity in temporal regions bilaterally, including the superior and middle temporal gyri and temporal poles. While the ASD group also recruited the inferior frontal gyrus (IFG) bilaterally, the TD group showed reliable activity only in the left IFG. However, significant activity was observed in the MPFC only in the TD group. Activity in this region was detected in the ASD group only at the most liberal spatial extent threshold of  $P < 0.05$ , uncorrected for multiple comparisons. For each group, reliable activity averaged across all conditions relative to rest is shown in Fig. 1. Talairach coordinates, Brodmann area (BA), and  $t$ -scores are presented in Table 4. Directly comparing the two groups revealed that children with ASD showed significantly greater activity than TD children in the right IFG as well as temporal regions bilaterally (Table 4 and Fig. 2). Greater activity was also observed in the left pre-central gyrus in ASD relative to TD children.

### Event knowledge + prosodic cues

When both contextual knowledge of the event outcome and prosodic cues were available to help infer the speaker's communicative intent, both groups showed significant activity in the superior and middle temporal gyri bilaterally, the left

temporal pole and the MPFC. However, while no reliable activity was observed in frontal regions outside of the MPFC in TD children, significant activity in the IFG was detected bilaterally in ASD children. Between-group ANCOVAs revealed that the ASD group did indeed engage the IFG more strongly than did the TD group during the EK + PC condition, after controlling for the effect of accuracy (Table 5). TD children did not show any regions of greater activity relative to children with ASD children for this condition.

### Event knowledge only

When contextual cues about the valence of the event were provided but the speaker's remark was delivered in a neutral tone of voice, both groups showed reliable activity in the right temporal pole in addition to the temporal regions activated during the EK + PC condition. Significant activity in the IFG was also observed in the left hemisphere in TD children and bilaterally in children with ASD. Reliable MPFC activity was detected only in the TD group. Between-group comparisons confirmed that the ASD group showed greater activity in the right IFG than did the TD group, as expected from the within-group activation patterns. Greater activity was also observed in the ASD group in left temporal regions, including the superior and middle temporal gyri, as well as in the left post-central gyrus. TD children showed greater activity than children with ASD in dorsomedial prefrontal regions (superior frontal gyrus, BA 6). For this condition, peaks of activity for the within- and between-group comparisons are shown in Table 6.

### Prosodic cues only

When the speaker's remark was made in a clearly sincere or sarcastic tone of voice but contextual information about the

**Table 4** Peaks of activity across all conditions versus rest

| Anatomical region      | BA  | H | TD group |     |     |       | ASD group |     |     |       | ASD > TD |     |     |      |  |  |  |
|------------------------|-----|---|----------|-----|-----|-------|-----------|-----|-----|-------|----------|-----|-----|------|--|--|--|
|                        |     |   | x        | y   | z   | t     | x         | y   | z   | t     | x        | y   | z   | t    |  |  |  |
| MPFC                   | 10  | L | -6       | 62  | 16  | 4.27  |           |     |     |       |          |     |     |      |  |  |  |
|                        | 9   | L | -10      | 50  | 34  | 5.32  |           |     |     |       |          |     |     |      |  |  |  |
|                        | 8   | L | -6       | 20  | 48  | 4.50  |           |     |     |       |          |     |     |      |  |  |  |
| Superior frontal gyrus | 6   | L | -4       | 8   | 54  | 5.54  |           |     |     |       |          |     |     |      |  |  |  |
| Post-central gyrus     | 213 | L |          |     |     |       | -38       | -30 | 58  | 5.60  |          |     |     |      |  |  |  |
| Pre-central gyrus      | 4   | L |          |     |     |       | -30       | -14 | 64  | 4.31  | -40      | -20 | 56  | 3.31 |  |  |  |
| IFG                    | 44  | L |          |     |     |       | -52       | 18  | 8   | 4.98  |          |     |     |      |  |  |  |
|                        | 45  | L |          |     |     |       | -56       | 24  | 14  | 6.52  |          |     |     |      |  |  |  |
|                        | 45  | R |          |     |     |       | 46        | 20  | 4   | 5.40  | 40       | 22  | 8   | 2.97 |  |  |  |
| STG                    | 47  | R |          |     |     |       | 34        | 24  | -6  | 4.36  |          |     |     |      |  |  |  |
|                        | 41  | R | 38       | -26 | 14  | 5.00  | 44        | -22 | 12  | 6.36  |          |     |     |      |  |  |  |
|                        | 42  | L | -50      | -32 | 10  | 7.92  | -56       | -26 | 8   | 10.12 | -48      | -26 | 16  | 4.22 |  |  |  |
| STS                    | 42  | R | 48       | -14 | 6   | 13.74 | 56        | -30 | 10  | 7.50  |          |     |     |      |  |  |  |
|                        | 22  | L | -60      | -28 | 6   | 12.23 | -60       | -34 | 6   | 9.34  |          |     |     |      |  |  |  |
|                        | 22  | R | 60       | -16 | 4   | 11.48 | 56        | -20 | 4   | 9.63  |          |     |     |      |  |  |  |
| Middle temporal gyrus  |     | L | -62      | -24 | 2   | 10.23 | -50       | -28 | 2   | 9.24  | -48      | -30 | 2   | 3.65 |  |  |  |
|                        |     | R | 52       | -38 | 6   | 5.34  | 56        | -30 | 4   | 7.50  | 40       | -4  | -12 | 3.21 |  |  |  |
| Temporal pole          | 21  | L | -62      | -30 | 0   | 9.21  | -66       | -36 | 0   | 6.03  |          |     |     |      |  |  |  |
|                        | 21  | R | 48       | -12 | -10 | 3.14  | 60        | -34 | 2   | 4.41  |          |     |     |      |  |  |  |
| Temporal pole          | 21  | L | -48      | 0   | -28 | 7.80  | -44       | 6   | -28 | 4.26  |          |     |     |      |  |  |  |
|                        | 21  | R |          |     |     |       | 40        | 2   | -26 | 6.08  | 44       | 2   | -26 | 2.89 |  |  |  |
|                        | 38  | L | -48      | 12  | -20 | 5.63  | -44       | 12  | -26 | 5.50  |          |     |     |      |  |  |  |
|                        | 38  | R | 48       | 10  | -10 | 5.44  | 44        | 12  | -18 | 3.48  |          |     |     |      |  |  |  |

BA = putative Brodmann area; H = hemisphere; L and R = left and right hemispheres, respectively; x, y, and z = the Talairach coordinates corresponding to the left–right, anterior–posterior, and inferior–superior axes, respectively; t = the highest t-score within a region.  $P < 0.05$ , corrected for multiple comparisons at cluster level;  $P < 0.01$ , corrected for multiple comparisons at voxel level.

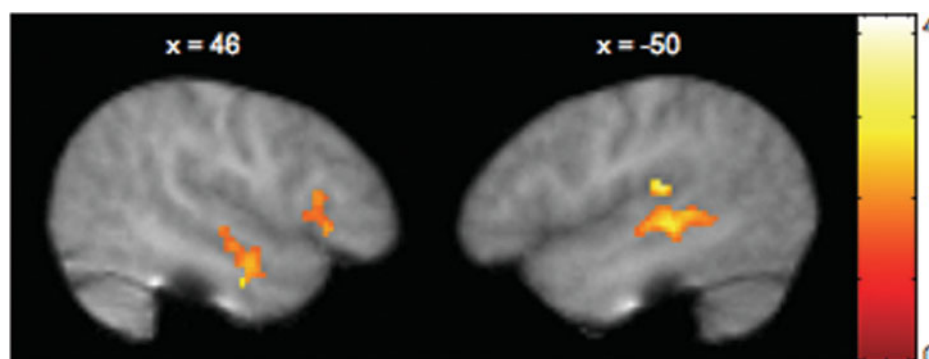

**Fig. 2** Brain regions more strongly activated in children with ASD relative to TD children. The ASD group showed significantly greater activity than the TD group in the right IFG as well as the STS bilaterally across all conditions relative to rest. Figures are thresholded at  $t > 1.80$ , corrected for multiple comparisons at the cluster level,  $P < 0.05$ .

event outcome was neutral, both groups showed reliable activity in the superior and middle temporal gyri, temporal poles and IFG bilaterally, as well as in the dorsal MPFC. Between-group comparisons revealed no reliable differences in frontal regions, consistent with the finding that the ASD and TD groups showed similar behavioural performance when knowledge of the event outcome was unavailable. However, greater activity was observed in the left STS and the right temporal pole in children with ASD versus TD children (Table 7).

### Correlations with social responsiveness and verbal IQ

Within the ASD group, we conducted simple regression analyses to examine the extent to which inter-subject variability in regional brain activity was associated with social and communicative impairment. Across all conditions, activity in the right temporal pole ( $x = 44$ ,  $y = 4$ ,  $z = -20$ ) was negatively correlated with both social impairment, as assessed by the SRS (social responsiveness scale) ( $r_{1,13} = -0.71$ ,  $P < 0.005$ ), and communicative impairment, as measured

**Table 5** Peaks of activity during EK + PC versus rest

| Anatomical region      | BA | H | TD group |     |     |       | ASD group |     |     |      | ASD > TD |     |    |      |
|------------------------|----|---|----------|-----|-----|-------|-----------|-----|-----|------|----------|-----|----|------|
|                        |    |   | x        | y   | z   | t     | x         | y   | z   | t    | x        | y   | z  | t    |
| MPFC                   | 9  | L | -2       | 50  | 34  | 3.63  | -8        | 56  | 26  | 5.11 |          |     |    |      |
|                        | 9  |   | 0        | 54  | 24  | 3.31  |           |     |     |      |          |     |    |      |
| Superior frontal gyrus | 6  | L | -8       | 10  | 62  | 4.10  |           |     |     |      |          |     |    |      |
| Pre-central gyrus      | 4  | L |          |     |     |       | -42       | -24 | 58  | 4.19 | -40      | -24 | 54 | 2.77 |
| IFG                    | 44 | R |          |     |     |       | 50        | 18  | 10  | 4.53 |          |     |    |      |
|                        | 45 | L |          |     |     |       | -54       | 24  | 12  | 5.77 | -54      | 20  | 12 | 3.15 |
|                        | 45 | R |          |     |     |       | 48        | 24  | 4   | 3.41 | 48       | 24  | 2  | 3.67 |
|                        | 47 | L |          |     |     |       | -48       | 24  | -6  | 4.22 |          |     |    |      |
|                        | 47 | R |          |     |     |       | 44        | 38  | -2  | 3.76 | 44       | 38  | -2 | 3.24 |
| STG                    | 41 | L |          |     |     |       | -48       | -28 | 14  | 5.10 |          |     |    |      |
|                        | 41 | R | 46       | -24 | 10  | 6.89  | 44        | -22 | 12  | 5.14 |          |     |    |      |
|                        | 42 | L |          |     |     |       | -58       | -24 | 10  | 5.87 |          |     |    |      |
|                        | 42 | R | 52       | -22 | 8   | 7.73  | 42        | -22 | 8   | 5.12 |          |     |    |      |
|                        | 22 | L | -58      | -22 | 4   | 9.01  | -64       | -36 | 6   | 5.67 |          |     |    |      |
| STS                    | 22 | R | 50       | -14 | 4   | 12.78 | 50        | -20 | 4   | 8.21 |          |     |    |      |
|                        |    | L | -58      | -32 | 6   | 6.69  | -54       | -26 | 4   | 7.03 |          |     |    |      |
|                        |    | R |          |     |     |       | 50        | -28 | 2   | 6.76 |          |     |    |      |
| Middle temporal gyrus  | 21 | L | -64      | -28 | -2  | 7.32  | -56       | -42 | 2   | 5.05 |          |     |    |      |
|                        | 21 | R | 50       | -10 | -12 | 3.03  | 56        | -24 | -10 | 2.84 |          |     |    |      |
|                        | 39 | L |          |     |     |       | -64       | -54 | 10  | 2.87 |          |     |    |      |
| Temporal pole          | 21 | L | -48      | 0   | -28 | 7.46  | -58       | -2  | -18 | 4.87 |          |     |    |      |
|                        | 38 | L | -48      | 12  | -20 | 5.57  |           |     |     |      |          |     |    |      |

BA = putative Brodmann area; H = hemisphere; L and R = left and right hemispheres, respectively; x, y, and z = the Talairach coordinates corresponding to the left–right, anterior–posterior, and inferior–superior axes, respectively; t = the highest t-score within a region.  $P < 0.05$ , corrected for multiple comparisons at cluster level;  $P < 0.01$ , corrected for multiple comparisons at voxel level.

by the communication subscale of the ADOS-G ( $r_{1,16} = 0.66$ ,  $P < 0.005$ ). In other words, children with a higher level of social and communicative functioning showed greater activity in the right temporal pole when attempting to infer a speaker's communicative intent.

Verbal IQ was positively associated with activity in temporal regions bilaterally and in the right IFG in children with ASD (Table 8). These regions were similar to the areas more strongly recruited by the ASD group across all conditions and may reflect a compensatory strategy 'hacked out' by those who are more verbally able. Verbal IQ did not correlate with activity in the TD group.

## Discussion

We found significant differences in the way in which children with ASD use prosodic and contextual cues to interpret irony at both the behavioural and neural levels. Despite performing at above chance levels, children with ASD were less accurate than TD children in detecting the communicative intent behind a speaker's remark overall and particularly in the conditions where the outcome of the event strongly indicated a non-literal interpretation. This finding suggests that children with ASD had difficulty in taking advantage of the contextual information available to interpret the speaker's intent, which converges with prior research demonstrating deficits in using context to make appropriate inferences (Ozonoff and Miller, 1996; Dennis *et al.*, 2001). Although

no performance differences were observed between groups when only the intonation of the speaker's remark was provided, the lack of differences in this condition probably reflects difficulty for TD children in the absence of contextual information rather than strength for children with ASD.

With respect to differences in patterns of brain activity, children with ASD recruited prefrontal and temporal regions more strongly than TD children overall. More specifically, greater activity was observed in the ASD group in the right IFG when only contextual cues were present, and bilaterally when both types of cues were available. Further, when forced to rely on prosodic cues alone, the ASD group showed heightened recruitment of temporal regions bilaterally. Importantly, the regions recruited more strongly in the ASD group were within the network also activated in the TD group. We interpret these results as consistent with the notion that increased task difficulty may be associated with greater activation of relevant brain regions (Durstun *et al.*, 2002; Tamm *et al.*, 2002). Although we controlled for the effects of accuracy, heightened activity in children with ASD may still be attributed to more effortful processing required for adequate task performance. Indeed, activity in frontotemporal regions has been found to increase with the amount of computational demand or ambiguity imposed by language-processing tasks in normal adults even when no behavioural consequences are observed (Just *et al.*, 1996; Mason *et al.*, 2003). Thus, greater engagement of the IFG in children with ASD relative to TD children may reflect difficulties in

**Table 6** Peaks of activity during EKO versus rest

| Anatomical region      | BA  | H | TD group |     |     |       | ASD group |     |     |      | TD > ASD |    |    |      | ASD > TD |     |     |      |
|------------------------|-----|---|----------|-----|-----|-------|-----------|-----|-----|------|----------|----|----|------|----------|-----|-----|------|
|                        |     |   | x        | y   | z   | t     | x         | y   | z   | t    | x        | y  | z  | t    | x        | y   | z   | t    |
| MPFC                   | 8   | L | -2       | 20  | 50  | 3.73  |           |     |     |      |          |    |    |      |          |     |     |      |
|                        | 9   | L | -16      | 48  | 34  | 3.94  |           |     |     |      |          |    |    |      |          |     |     |      |
|                        | 10  | L | -6       | 62  | 16  | 3.50  |           |     |     |      |          |    |    |      |          |     |     |      |
| Superior frontal gyrus | 6   | L | -2       | 8   | 52  | 3.77  |           |     |     |      | -4       | 18 | 46 | 2.63 |          |     |     |      |
| Cingulate gyrus        | 32  |   | 2        | 20  | 42  | 2.62  |           |     |     |      |          |    |    |      |          |     |     |      |
| Pre-central gyrus      | 4   | L |          |     |     |       | -36       | -24 | 48  | 4.80 |          |    |    |      | -30      | -14 | 62  | 2.75 |
| Post-central gyrus     | 213 | L | -44      | -22 | 54  | 3.39  | -48       | -24 | 52  | 5.05 |          |    |    |      | -50      | -24 | 50  | 2.84 |
| IFG                    | 44  | L |          |     |     |       | -58       | 14  | 6   | 3.76 |          |    |    |      |          |     |     |      |
|                        | 45  | L | -50      | 18  | 20  | 6.84  | -56       | 26  | 12  | 4.24 |          |    |    |      |          |     |     |      |
|                        | 45  | R |          |     |     |       | 40        | 20  | 12  | 4.68 |          |    |    |      | 40       | 20  | 12  | 3.83 |
|                        | 47  | L | -54      | 14  | -4  | 2.95  | -48       | 24  | -6  | 4.07 |          |    |    |      |          |     |     |      |
|                        | 47  | R |          |     |     |       | 44        | 30  | -6  | 4.15 |          |    |    |      |          |     |     |      |
| STG                    | 41  | R |          |     |     |       | 42        | -22 | 12  | 3.51 |          |    |    |      |          |     |     |      |
|                        | 42  | L | -46      | -32 | 12  | 8.64  | -60       | -14 | 8   | 6.60 |          |    |    |      |          |     |     |      |
|                        | 42  | R | 48       | -14 | 6   | 9.33  | 44        | -16 | 8   | 4.79 |          |    |    |      |          |     |     |      |
|                        | 22  | L | -62      | -18 | 2   | 11.32 | -60       | -12 | 0   | 6.47 |          |    |    |      | -44      | -20 | 2   | 3.55 |
|                        | 22  | R | 46       | -24 | 6   | 8.97  | 56        | -20 | 4   | 8.41 |          |    |    |      |          |     |     |      |
| STS                    |     | L | -60      | -44 | 8   | 5.72  | -54       | -40 | 6   | 5.94 |          |    |    |      | -46      | -32 | 4   | 2.99 |
|                        |     | R | 58       | -8  | 0   | 6.15  | 58        | -28 | 4   | 4.09 |          |    |    |      |          |     |     |      |
| Middle temporal gyrus  | 21  | L | -54      | 2   | -12 | 5.05  | -62       | -20 | -8  | 5.00 |          |    |    |      | -44      | -6  | -16 | 3.91 |
|                        | 21  | R | 56       | -10 | -4  | 6.26  | 48        | -12 | -4  | 4.14 |          |    |    |      |          |     |     |      |
| Temporal pole          | 21  | L | -48      | 2   | -22 | 3.71  | -54       | -6  | -20 | 4.43 |          |    |    |      |          |     |     |      |
|                        | 21  | R |          |     |     |       | 40        | 2   | -26 | 3.89 |          |    |    |      |          |     |     |      |
|                        | 38  | L | -40      | 12  | -28 | 4.07  | -50       | 8   | -22 | 5.02 |          |    |    |      |          |     |     |      |
|                        | 38  | R | 46       | 10  | -12 | 4.67  | 44        | 12  | -18 | 3.61 |          |    |    |      |          |     |     |      |

BA = putative Brodmann area; H = hemisphere; L and R = left and right hemispheres respectively; x, y, and z = the Talairach coordinates corresponding to the left–right, anterior–posterior, and inferior–superior axes, respectively; t = the highest t-score within a region.  $P < 0.05$ , corrected for multiple comparisons at cluster level;  $P < 0.01$ , corrected for multiple comparisons at voxel level.

integrating contextual cues with the speaker's utterance in order to interpret communicative intent. The temporal regions more strongly activated in ASD children when only prosodic cues were available have been previously established to be part of frontotemporal networks involved in processing affective prosody (Kotz *et al.*, 2003; Mitchell *et al.*, 2003; Wildgruber *et al.*, 2004, 2005; Hesling *et al.*, 2005). Greater recruitment of these temporal regions may reflect a greater burden for ASD than TD children when task demands require reliance on prosodic information alone.

Interestingly, activity in the right temporal pole was inversely related to impairment in communication and social interaction in children with ASD. Previous neuroimaging work has implicated the temporal poles as part of the neural architecture underlying mentalizing abilities (Siegal and Varley, 2002; Frith and Frith, 2003). In particular, activity in this region is elicited by the recognition of familiar faces and voices and the retrieval of relevant semantic and emotional context (Frith and Frith, 2003). Children with ASD who engaged this region when attempting to infer a speaker's communicative intent were more likely to have better social and communicative skills in real-life situations. However, we had predicted that children with ASD would show less activity than TD children in regions involved in understanding others' mental states (i.e. the MPFC, STS and temporal poles)

and our results did not support this hypothesis. Across all conditions, no reliable between-group differences were observed in the MPFC, although activity in this region was significant in TD children but not so in children with ASD unless a less stringent spatial extent threshold was applied. Furthermore, temporal regions, including the STS and temporal pole, were recruited more strongly in children with ASD than TD children overall. Our results are contrary to those of Castelli *et al.* (2002), who found significantly reduced activity in the MPFC, STS and temporal poles in adults with ASD relative to controls while viewing animated sequences of shapes moving in a way that typically elicits the attribution of intentions.

One possible explanation for the discrepant findings may relate to the amount of automatic or implicit processing required by the experimental tasks. The animated shape paradigm used by Castelli *et al.* (2002) was a passive perceptual task, which relied on the automatic recruitment of networks supporting theory of mind. In contrast, the present study explicitly required participants to interpret a character's communicative intentions. Previous studies that also used a more cognitive/explicit task involving comprehension of the complex mental states of story characters have yielded results similar to ours (Happé *et al.*, 1996; Nieminen-von Wendt *et al.*, 2003). Specifically, Nieminen-von Wendt



**Table 7** Peaks of activity during PCO versus rest

| Anatomical region      | BA  | H | TD group |     |     |      | ASD group |     |     |      | ASD > TD |     |     |      |  |  |  |
|------------------------|-----|---|----------|-----|-----|------|-----------|-----|-----|------|----------|-----|-----|------|--|--|--|
|                        |     |   | x        | y   | z   | t    | x         | y   | z   | t    | x        | y   | z   | t    |  |  |  |
| MPFC                   | 8   | L | -10      | 30  | 52  | 4.50 |           |     |     |      |          |     |     |      |  |  |  |
| Superior frontal gyrus | 6   | L | -6       | 16  | 60  | 4.68 | -6        | 16  | 56  | 4.42 |          |     |     |      |  |  |  |
| Cingulate gyrus        | 32  |   | 2        | 22  | 40  | 4.47 |           |     |     |      |          |     |     |      |  |  |  |
| Post-central gyrus     | 213 | L |          |     |     |      | -46       | -28 | 56  | 4.86 |          |     |     |      |  |  |  |
| IFG                    | 44  | L |          |     |     |      | -52       | 16  | 8   | 4.21 |          |     |     |      |  |  |  |
|                        | 44  | R |          |     |     |      |           |     |     |      |          |     |     |      |  |  |  |
|                        | 45  | L | -42      | 18  | 22  | 2.92 | -38       | 16  | 14  | 3.35 |          |     |     |      |  |  |  |
|                        | 45  | R | 52       | 24  | 8   | 3.48 |           |     |     |      |          |     |     |      |  |  |  |
|                        | 47  | L | -54      | 32  | -2  | 4.27 | -46       | 24  | 0   | 3.35 |          |     |     |      |  |  |  |
|                        | 47  | R | 50       | 18  | 0   | 3.28 | 32        | 24  | -4  | 4.96 |          |     |     |      |  |  |  |
| STG                    | 41  | R | 42       | -30 | 12  | 4.12 | 48        | -24 | 12  | 4.59 |          |     |     |      |  |  |  |
|                        | 42  | L | -44      | -32 | 10  | 4.69 | -62       | -20 | 10  | 8.02 |          |     |     |      |  |  |  |
|                        | 42  | R | 44       | -18 | 8   | 8.50 | 60        | -24 | 8   | 5.59 |          |     |     |      |  |  |  |
|                        | 22  | L | -56      | -20 | 4   | 9.73 | -62       | -20 | 0   | 5.83 |          |     |     |      |  |  |  |
|                        | 22  | R | 50       | -12 | 2   | 8.70 | 50        | -20 | 2   | 6.38 |          |     |     |      |  |  |  |
| STS                    |     | L | -62      | -26 | 0   | 9.88 | -58       | -26 | -2  | 6.03 | -48      | -38 | 6   | 4.19 |  |  |  |
|                        |     | R | 52       | -40 | 8   | 5.88 |           |     |     |      |          |     |     |      |  |  |  |
| Middle temporal gyrus  | 21  | L | -54      | -24 | -6  | 4.98 | -66       | -32 | 0   | 6.84 |          |     |     |      |  |  |  |
|                        | 21  | R | 48       | -12 | -10 | 4.40 | 50        | -18 | -4  | 4.11 |          |     |     |      |  |  |  |
| Temporal pole          | 21  | L | -46      | 0   | -30 | 4.29 |           |     |     |      |          |     |     |      |  |  |  |
|                        | 21  | R | 40       | 3   | -30 | 2.94 | 38        | 2   | -30 | 5.86 | 36       | 2   | -28 | 3.92 |  |  |  |
|                        | 38  | L | -48      | 12  | -20 | 5.55 | -46       | 12  | -22 | 3.95 |          |     |     |      |  |  |  |
|                        | 38  | R | 44       | 10  | -18 | 5.87 | 44        | 4   | -18 | 4.85 | 32       | 10  | -26 | 3.12 |  |  |  |

BA = putative Brodmann area; H = hemisphere; L and R = left and right hemispheres, respectively; x, y, and z = the Talairach coordinates corresponding to the left–right, anterior–posterior, and inferior–superior axes, respectively; t = the highest t-score within a region. *P* < 0.05, corrected for multiple comparisons at cluster level; *P* < 0.01, corrected for multiple comparisons at voxel level.

**Table 8** Brain activity associated with verbal IQ in children with ASD

| Anatomical region     | BA  | H | Coordinates |     |     |      |
|-----------------------|-----|---|-------------|-----|-----|------|
|                       |     |   | x           | y   | z   | t    |
| IFG                   | 45  | R | 38          | 26  | 6   | 3.35 |
| Post-central gyrus    | 213 | L | -56         | -18 | 44  | 4.93 |
| STG                   | 22  | L | -62         | -6  | 2   | 4.40 |
|                       | 22  | R | 52          | -12 | 2   | 4.32 |
| Middle temporal gyrus | 21  | L | -64         | -22 | -4  | 3.77 |
|                       |     | R | 46          | -8  | -8  | 4.17 |
| Temporal pole         | 38  | L | -46         | 8   | -18 | 3.66 |
|                       | 38  | R | 48          | 10  | -10 | 3.88 |

BA = putative Brodmann area; H = hemisphere; L and R = left and right hemispheres, respectively; x, y, and z = the Talairach coordinates corresponding to the left–right, anterior–posterior, and inferior–superior axes, respectively; t = the highest t-score within a region.

*et al.* (2003) found significant MPFC activity in both adults with ASD and healthy controls during stories requiring the interpretation of a character’s actions (versus non-mentalistic physical stories). Although this activity appeared to be weaker and less extensive in the ASD group, no reliable differences were observed in this region when the two groups were

compared directly. Similarly, Happe *et al.* (1996) used the same stories and found that both adults with ASD and normal controls showed reliable activity in the MPFC, although the region recruited by the ASD group was slightly adjacent to and more ventral than the area engaged by normal adults.

While it could be argued that some abnormalities in the neural circuitry underlying the interpretation of a character’s intent were observed in the ASD group in each of these studies, the fact that no reliable between-group differences were detected in the MPFC shows that individuals with ASD do have the ability to bring this region on line under certain circumstances—specifically, when task demands require attention to mental states. Moreover, we recently found that, despite showing less activity than TD children in the MPFC when interpreting communicative intent during potentially ironic scenarios, specific instructions to attend to important social cues, such as the speaker’s facial expression and tone of voice, elicited significantly greater activity in this region in children with ASD (Wang *et al.*, submitted for publication). This distinction between deficits in implicit or automatic processing of social information and relative strength in explicit or cognitive assessment has been noted in the domain of face processing as well (Critchley *et al.*, 2000; Wang *et al.*, 2004). For example, Critchley *et al.* (2000) observed that adults with autism showed reduced activity

in the amygdala relative to controls when labelling the gender of emotional faces (implicit condition), but comparable levels of activity labelling the emotion in the same faces (explicit condition). Interestingly, in the present study, children with higher verbal IQ were more likely to show greater engagement of regions more strongly activated by the ASD group overall (i.e. right IFG and bilateral temporal regions), which suggests that this increased activity may reflect compensatory strategies involving the use of verbal reasoning skills in place of an ‘instinct’ for interpreting the communicative intent of others.

Given that children with ASD were able to perform at above chance levels in all conditions and that the regions recruited more strongly in the ASD group were within the network also activated in the TD group, our results suggest that children with ASD were interpreting the intended meaning of utterances in a more effortful manner, though using similar neural mechanisms. Together with the studies discussed above, our findings support the notion that individuals with ASD are able to recruit more normative neural networks when task demands require attention to important social cues and allow for participants to capitalize on their cognitive skills. Here, successful task performance was dependent on attention to and assessment of contextual and/or prosodic information, particularly when only one type of cue was available for interpreting the intent behind a potentially ironic remark. It is possible, and in fact quite likely, that in a less structured environment requiring the implicit interpretation of communicative intent, abnormalities in neural functioning would be more striking in children with ASD. This distinction between strengths in the explicit processing of social information and impairment when implicit processing is required remains speculative, as we did not directly examine this possibility in the present study. Nevertheless, the observations that activity in the MPFC was comparable between groups and that activity in the STS and right temporal pole was greater in ASD than TD children argue against a fundamental deficit in the neural architecture supporting mentalizing. Instead, recruitment of this circuitry when explicit processing is encouraged suggests that one possible intervention strategy would be to teach children with ASD to apply their cognitive strengths to more naturalistic settings. Perhaps, increased awareness of and attention to important social cues would lead to more frequent engagement of normative neural circuitry and, even more importantly, greater success in everyday social interactions.

### Acknowledgements

This study was supported by grants from the NIDCD (R03 DC005159), the NICHD (P01 HD035470), the National Alliance for Autism Research, the Cure Autism Now foundation, and the U.C. Davis M.I.N.D. Institute. For generous support the authors also wish to thank the Brain Mapping Medical Research Organization, the Brain Mapping Support Foundation, the Pierson-Lovelace Foundation, the

Ahmanson Foundation, the Tamkin Foundation, the Jennifer Jones-Simon Foundation, the Capital Group Companies the Charitable Foundation, the Robson Family, the William M. and Linda R. Dietel Philanthropic Fund at the Northern Piedmont Community Foundation, the Northstar Fund, and the National Center for Research Resources (grants RR12169, RR13642, and RR08655).

### References

- Ackerman BP. Young children’s understanding of a speaker’s intentional use of a false utterance. *Dev Psychol* 1981; 17: 472–80.
- Ackerman BP. Children’s sensitivity to comprehension failure in interpreting a nonliteral use of an utterance. *Child Dev* 1986; 57: 485–97.
- Bauman ML, Kemper TL. Neuroanatomic observations of the brain in autism: a review and future directions. *Int J Dev Neurosci* 2005; 23: 183–7.
- Capelli CA, Nakagawa N, Madden CM. How children understand sarcasm: the role of context and intonation. *Child Dev* 1990; 61: 1824–41.
- Castelli F, Frith C, Happe F, Frith U. Autism, Asperger syndrome and brain mechanisms for the attribution of mental states to animated shapes. *Brain* 2002; 125: 1839–49.
- Constantino JN, Davis SA, Todd RD, Schindler MK, Gross MM, Brophy SL, et al. Validation of a brief quantitative measure of autistic traits: comparison of the social responsiveness scale with the autism diagnostic interview-revised. *J Autism Dev Disord* 2003; 33: 427–33.
- Courchesne E, Pierce K. Brain overgrowth in autism during a critical time in development: implications for frontal pyramidal neuron and interneuron development and connectivity. *Int J Dev Neurosci* 2005; 23: 153–70.
- Critchley HD, Daly EM, Bullmore ET, Williams SC, Van Amelsvoort T, Robertson DM, et al. The functional neuroanatomy of social behaviour: changes in cerebral blood flow when people with autistic disorder process facial expressions. *Brain* 2000; 123: 2203–12.
- de Groot A, Kaplan J, Rosenblatt E, Dews S, Winner E. Understanding versus discriminating nonliteral utterances: evidence for a dissociation. *Metaphor and Symbol Special Issue. Dev Perspect Metaphor* 1995; 10: 255–73.
- Demorest A, Meyer C, Phelps E, Gardner H, Winner E. Words speak louder than actions: understanding deliberately false remarks. *Child Dev* 1984; 55: 1527–34.
- Dennis M, Lazenby AL, Lockyer L. Inferential language in high-function children with autism. *J Autism Dev Disord* 2001; 31: 47–54.
- Durston S, Thomas KM, Worden MS, Yang Y, Casey BJ. The effect of preceding context on inhibition: an event-related fMRI study. *Neuroimage* 2002; 16: 449–53.
- Friston KJ, Holmes AP, Price CJ, Buchel C, Worsley KJ. Multisubject fMRI studies and conjunction analyses. *Neuroimage* 1999; 10: 385–96.
- Frith U, Frith CD. Development and neurophysiology of mentalizing. *Philos Trans R Soc Lond B Biol Sci* 2003; 358: 459–73.
- Frith U, Snowling M. Reading for meaning and reading for sound in autistic and dyslexic children. *Br J Dev Psychol* 1983; 1: 329–42.
- Giora R, Zaidel E, Soroker N, Batori G, Kasher A. Differential effect of right- and left-hemisphere damage on understanding sarcasm and metaphor. The uses of processing of irony and sarcasm. *Metaphor and Symbol Special Issue. Dev Perspect Metaphor* 2000; 15: 63–83.
- Hancock JT, Dunham PJ, Purdy K. Children’s comprehension of critical and complimentary forms of verbal irony. *J Cognit Dev* 2000; 1: 227–48.
- Happe FGE. Communicative competence and theory of mind in autism: a test of relevance theory. *Cognition* 1993; 48: 101–19.
- Happe FGE. An advanced test of theory of mind: understanding of story characters’ thoughts and feelings by able autistic, mentally handicapped, and normal children and adults. *J Autism Dev Disord* 1994; 24: 129–54.

- Happé FGE. Understanding minds and metaphors: insights from the study of figurative language in autism. *Metaphor Symbolic Activity* 1995; 10: 275–95.
- Happé FGE. Central coherence and theory of mind in autism: reading homographs in context. *Br J Dev Psychol* 1997; 15: 1–12.
- Happé F, Ehlers S, Fletcher P, Frith U, Johansson M, Gillberg C, et al. 'Theory of mind' in the brain. Evidence from a PET scan study of Asperger syndrome. *Neuroreport* 1996; 8: 197–201.
- Hesling I, Clement S, Bordessoules M, Allard M. Cerebral mechanisms of prosodic integration: evidence from connected speech. *Neuroimage* 2005; 24: 937–47.
- Hobson RP, Ouston J, Lee A. Naming emotion in faces and voices: abilities and disabilities in autism and mental retardation. *Br J Dev Psychol* 1989; 7: 237–50.
- Jolliffe T, Baron-Cohen S. A test of central coherence theory: linguistic processing in high-functioning adults with autism or Asperger syndrome: is local coherence impaired? *Cognition* 1999; 71: 149–85.
- Jolliffe T, Baron-Cohen S. Linguistic processing in high-functioning adults with autism or Asperger's syndrome. Is global coherence impaired? *Psychol Med* 2000; 30: 1169–87.
- Just MA, Carpenter PA, Keller TA, Eddy WF, Thulborn KR. Brain activation modulated by sentence comprehension. *Science* 1996; 274: 114–6.
- Kaland N, Moller-Nielsen A, Callesen K, Mortensen EL, Gottlieb D, Smith L. A new 'advanced' test of theory of mind: evidence from children and adolescents with Asperger syndrome. *J Child Psychol Psychiatry* 2002; 43: 517–28.
- Kaland N, Moller-Nielsen A, Smith L, Mortensen EL, Callesen K, Gottlieb D. The Strange Stories test—a replication study of children and adolescents with Asperger syndrome. *Eur Child Adolesc Psychiatry* 2005; 14: 73–82.
- Kaplan JA, Brownell HH, Jacobs JR, Gardner H. The effects of right hemisphere damage on the pragmatic interpretation of conversational remarks. *Brain Lang* 1990; 38: 315–33.
- Keenan TR, Quigley K. Do young children use echoic information in their comprehension of sarcastic speech? A test of echoic mention theory. *Br J Dev Psychol* 1999; 17: 83–96.
- Klin A. Young autistic children's listening preferences in regard to speech: a possible characterization of the symptom of social withdrawal. *J Autism Dev Disord* 1991; 21: 29–42.
- Klin A. Listening preferences in regard to speech in four children with developmental disabilities. *J Child Psychol Psychiatry* 1992; 33: 763–9.
- Kotz SA, Meyer M, Alter K, Besson M, von Cramon DY, Friederici AD. On the lateralization of emotional prosody: an event-related functional MR investigation. *Brain Lang* 2003; 86: 366–76.
- Kuhl PK, Coffey-Corina S, Padden D, Dawson G. Links between social and linguistic processing of speech in preschool children with autism: behavioral and electrophysiological measures. *Dev Sci* 2005; 8: F1–F12.
- Leekam SR, Prior M. Can autistic children distinguish lies from jokes? A second look at second-order belief attribution. *J Child Psychol Psychiatry* 1994; 35: 901–15.
- Lopez B, Leekam SR. Do children with autism fail to process information in context? *J Child Psychol Psychiatry* 2003; 44: 285–300.
- Lord C, Rutter M, Le Couteur A. Autism Diagnostic Interview—Revised: a revised version of a diagnostic interview for caregivers of individuals with possible pervasive developmental disorders. *J Autism Dev Disord* 1994; 24: 659–85.
- Lord C, Risi S, Lambrecht L, Cook EH Jr, Leventhal BL, DiLavore PC, et al. The Autism Diagnostic Observation Schedule—Generic: a standard measure of social and communication deficits associated with the spectrum of autism. *J Autism Dev Disord* 2000; 30: 205–23.
- Martin I, McDonald S. An exploration of causes of non-literal language problems in individuals with Asperger syndrome. *J Autism Dev Disord* 2004; 34: 311–28.
- Mason RA, Just MA, Keller TA, Carpenter PA. Ambiguity in the brain: what brain imaging reveals about the processing of syntactically ambiguous sentences. *J Exp Psychol Learn Mem Cogn* 2003; 29: 1319–38.
- Milosky LM, Ford JA. The role of prosody in children's inferences of ironic intent. *Discourse Process* 1997; 23: 47–61.
- Minschew NJ, Goldstein G, Siegel DJ. Neuropsychologic functioning in autism: profile of a complex information processing disorder. *J Int Neuropsychol Soc* 1997; 3: 303–16.
- Mitchell RLC, Elliott R, Barry M, Cruttenden A, Woodruff PWR. The neural response to emotional prosody, as revealed by functional magnetic resonance imaging. *Neuropsychologia* 2003; 41: 1410–21.
- Nieminen-von Wendt T, Metsahonkala L, Kulomaki T, Aalto S, Autti T, Vanhala R, et al. Changes in cerebral blood flow in Asperger syndrome during theory of mind tasks presented by the auditory route. *Eur Child Adolesc Psychiatry* 2003; 12: 178–89.
- Ozonoff S, Miller JN. An exploration of right-hemisphere contributions to the pragmatic impairments of autism. *Brain Lang* 1996; 52: 411–34.
- Paul R, Augustyn A, Klin A, Volkmar FR. Perception and production of prosody by speakers with autism spectrum disorders. *J Autism Dev Disord* 2005; 35: 205–20.
- Pelphrey K, Adolphs R, Morris JP. Neuroanatomical substrates of social cognition dysfunction in autism. *Ment Retard Dev Disabil Res Rev* 2004; 10: 259–71.
- Rockwell P. Lower, slower, louder: vocal cues of sarcasm. *J Psycholinguist Res* 2000; 29: 483–95.
- Rutherford MD, Baron-Cohen S, Wheelwright S. Reading the mind in the voice: a study with normal adults and adults with Asperger syndrome and high functioning autism. *J Autism Dev Disord* 2002; 32: 189–94.
- Rutter M, Bailey A, Berument SK, Le Couteur A, Lord C, Pickles A. Social communication questionnaire (SCQ). Los Angeles, CA: Western Psychological Services; 2003.
- Schultz RT. Developmental deficits in social perception in autism: the role of the amygdala and fusiform face area. *Int J Dev Neurosci* 2005; 23: 125–41.
- Shamay SG, Tomer R, Aharon-Peretz J. Deficit in understanding sarcasm in patients with prefrontal lesion is related to impaired empathic ability. *Brain Cogn* 2002; 48: 558–63.
- Shamay-Tsoory SG, Tomer R, Berger BD, Aharon-Peretz J. Characterization of empathy deficits following prefrontal brain damage: the role of the right ventromedial prefrontal cortex. *J Cogn Neurosci* 2003; 15: 324–37.
- Shamay-Tsoory SG, Tomer R, Aharon-Peretz J. The neuroanatomical basis of understanding sarcasm and its relationship to social cognition. *Neuropsychol* 2005; 19: 288–300.
- Siegal M, Blades M. Language and auditory processing in autism. *Trends Cogn Sci* 2003; 7: 378–80.
- Siegal M, Varley R. Neural systems involved in 'theory of mind'. *Nat Rev Neurosci* 2002; 3: 463–71.
- Sullivan K, Winner E, Hopfield N. How children tell a lie from a joke: the role of second-order mental state attributions. *Br J Dev Psychol* 1995; 13: 191–204.
- Tager-Flusberg H. On the nature of linguistic functioning in early infantile autism. *J Autism Dev Disord* 1981; 11: 45–56.
- Tamm L, Menon V, Reiss AL. Maturation of brain function associated with response inhibition. *J Am Acad Child Adolesc Psychiatry* 2002; 41: 1231–8.
- Tantam DJH. Asperger's syndrome in adulthood. In: Frith U, editor. *Autism and Asperger syndrome*. Cambridge, UK: Cambridge University Press; 1991. p. 147–83.
- Tompkins CA, Mateer CA. Right hemisphere appreciation of prosodic and linguistic indications of implicit attitude. *Brain Lang* 1985; 24: 185–203.
- Van Lancker DR, Cornelius C, Kreiman J. Recognition of emotional-prosodic meanings in speech by autistic, schizophrenic, and normal children. *Dev Neuropsychol* 1989; 5: 207–26.
- Wang AT, Dapretto M, Hariri AR, Sigman M, Bookheimer SY. Neural correlates of facial affect processing in children and adolescents with autism spectrum disorder. *J Am Acad Child Adolesc Psychiatry* 2004; 43: 481–90.
- Wechsler D. *Wechsler Intelligence Scale for Children—Third Edition*. San Antonio, TX: The Psychological Corporation; 1991.
- Wechsler D. *Wechsler Abbreviated Scale of Intelligence*. San Antonio, TX: The Psychological Corporation; 1999.
- Wildgruber D, Hertrich I, Riecker A, Erb M, Anders S, Grodd W, et al. Distinct frontal regions subserve evaluation of linguistic and emotional aspects of speech intonation. *Cereb Cortex* 2004; 14: 1384–9.

- Wildgruber D, Riecker A, Hertrich I, Erb M, Grodd W, Ethofer T, et al. Identification of emotional intonation evaluated by fMRI. *Neuroimage* 2005; 24: 1233–41.
- Winner E, Brownell H, Happe F, Blum A, Pincus D. Distinguishing lies from jokes: theory of mind deficits and discourse interpretation in right hemisphere brain-damaged patients. *Brain Lang* 1998; 62: 89–106.
- Winner E, Leekam S. Distinguishing irony from deception: understanding the speaker's second-order intention. *Br J Dev Psychol* 1991; 9: 257–70.
- Woods RP. Characterizing volume and surface deformations in an atlas framework: theory, applications, and implementation. *Neuroimage* 2003; 18: 769–88.
- Woods RP, Grafton ST, Holmes CJ, Cherry SR, Mazziotta JC. Automated image registration: I. General methods and intrasubject, intramodality validation. *J Comput Assist Tomogr* 1998a; 22: 139–52.
- Woods RP, Grafton ST, Watson JD, Sicotte NL, Mazziotta JC. Automated image registration: II. Intersubject validation of linear and nonlinear models. *J Comput Assist Tomogr* 1998b; 22: 153–65.
- Woods RP, Dapretto M, Sicotte NL, Toga AW, Mazziotta JC. Creation and use of a Talairach-compatible atlas for accurate, automated, nonlinear intersubject registration, and analysis of functional imaging data. *Hum Brain Mapp* 1999; 8: 73–9.
- Zaidel E, Kasher A, Soroker N, Batori G. Effects of right and left hemisphere damage on performance of the 'Right Hemisphere Communication Battery'. *Brain Lang* 2002; 80: 510–35.
